# Supplementary material
Source: publisher figshare collection journal article supplement (https://gsapubs.figshare.com/articles/dataset/_/12536621)
Supplement: Supplementary file 1 [file 1]

Pană, D.I., Poulton, T.P., and DuFrane, S.A., 2018, U-Pb detrital zircon dating supports Early Jurassic initiation of the Cordilleran foreland basin in southwestern Canada: GSA Bulletin, <https://doi.org/10.1130/B31862.1>.

## Data Repository

U-Pb raw data

### ANALYTICAL TECHNIQUE

In situ U-Pb zircon data was collected using laser ablation multi collector inductively coupled mass spectrometry (LA-MC-ICP-MS) at the Canadian Center for Isotopic Micro-analysis (CCIM) at the University of Alberta. A detailed description of the analytical approach is reported in Simonetti et al. (2005), so only a brief description is provided here.

The analytical setup consists of a New Wave UP-213 laser ablation system interfaced with a Nu plasma MC-ICPMS equipped with three ion counters. We operated the laser at 4 Hz pulse rate and a beam diameter of 30 mm which yielded a fluence of  $\sim 3 \text{ J/cm}^2$ . Ablations were conducted in a He atmosphere at a flow rate of 1 L/min through the cell. Output from the cell was joined to the output from a standard Nu plasma desolvating nebulizer (DSN). On peak gas + acid blanks (30s) were measured prior to a set of 10–20 analyses. Data was collected statically, consisting of 30 1s integrations. Before and after each set of analyses, we analyzed zircon reference materials, GJ-1 (Jackson et al., 2004), and LH9415 (Ashton et al., 1999, Heaman, Unpublished data) to monitor U-Pb fractionation, reproducibility, and instrument drift. Mass bias for Pb isotopes was corrected by simultaneously measuring  $^{205}\text{Tl}/^{203}\text{Tl}$  from an aspirated 0.5ppb Tl solution (NIST SRM 997) using an exponential mass fractionation law and assuming a natural  $^{205}\text{Tl}/^{203}\text{Tl}$  of 2.3871.

All data were reduced offline using an Excel-based spreadsheet. Unknowns were normalized to the zircon reference material GJ-1 and the uncertainties reported are a quadratic combination of: 1) the standard error of the measured isotope ratio and 2) the standard deviation of the standard means. Reproducibility of the zircon reference material is estimated to be  $\sim 1\%$  for  $^{207}\text{Pb}/^{206}\text{Pb}$  and  $3\%$  for  $^{206}\text{Pb}/^{238}\text{U}$ . Data points were discarded if it was obvious that an inclusion contributed to analysis, there was extreme common Pb component, or the grain was in fact not zircon. For plotting purposes data were filtered using a 10% discordance filter with the following criteria: for ages less than 500 Ma, concordance as assessed by comparing the  $^{206}\text{Pb}/^{238}\text{U}$  and  $^{207}\text{Pb}/^{206}\text{Pb}$  ages, for ages less than 500 Ma, concordance was assessed by comparing the  $^{207}\text{Pb}/^{235}\text{U}$  and  $^{206}\text{Pb}/^{238}\text{U}$  ages. All plots were generated using the Isoplot software of Ludwig (2003).

## REFERENCES CITED

- Ashton, K.E., Heaman, L.E., Lewry, J.F., Hartlaub, R.P., and Shi, R., 1999, Age and origin of the Jan Lake Complex: a glimpse at the buried Archean craton of the Trans-Hudson Orogen: Canadian Journal of Earth Sciences, v. 36, p. 185–208, <https://doi.org/10.1139/e98-038>.
- Jackson, S.E., Pearson, N.J., Griffin, W.L., and Belousova, E.A., 2004, The application of laser ablation-inductively coupled plasma-mass spectrometry to in situ U–Pb zircon geochronology: Chemical Geology, v. 211, p. 47–69, <https://doi.org/10.1016/j.chemgeo.2004.06.017>.
- Ludwig, K.R., 2003. User's manual for Isoplot 3.00. A geochronological Toolkit for Microsoft Excel. Berkeley Geochronology Center, Special Publication No. 4a, Berkeley, California.
- Simonetti, A., Heaman, L.M., Hartlaub, R.P., Creaser, R.A., MacHattie, T.G., and Bohm, C.O., 2005, U–Pb zircon dating by laser ablation –MC–ICP–MS using a new multiple ion counting Faraday collector array: Journal of Analytical Atomic Spectrometry, v. 20, no. 8, p. 677–686, doi:<https://doi.org/10.1039/b504465k>.

**Plate I.** Microphotographs of the analyzed detrital zircons from selected exposures (red squares) in the stratigraphic units discussed in text.
